# Supplementary material for: An Improved SEIR Model Considering the Impact of Contact-Restricting Policies: A Case Study of COVID-19 in Wuhan
Source: Research Square preprint supplement (doi:10.21203/rs.3.rs-715229/v1), 2021-08-04

**Appendix**

We assumed that the city lockdown was advanced by 3 days, 5 days, 7 days, 9 days, and 11 days. When the city lockdown is implemented n days in advance, we assume that the contact rate on the x day is the real contact rate on the (x+n) days. The results are shown in Figure S1.

**Figure S1**

Simulation results of the number of infected patients when delaying the implementation of movement-restricting measures in Italy


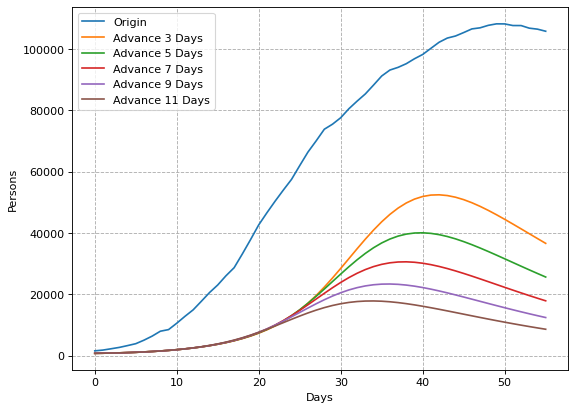

Supplement: Supplementary file 1 [file 544a847dba71601f244c2671.docx]
